# Supplementary material
Source: Springer Nature journal article supplement (https://www.springermedizin.de/resource/supplementary/12879_2013_3633_MOESM2_ESM.pdf/9446256)

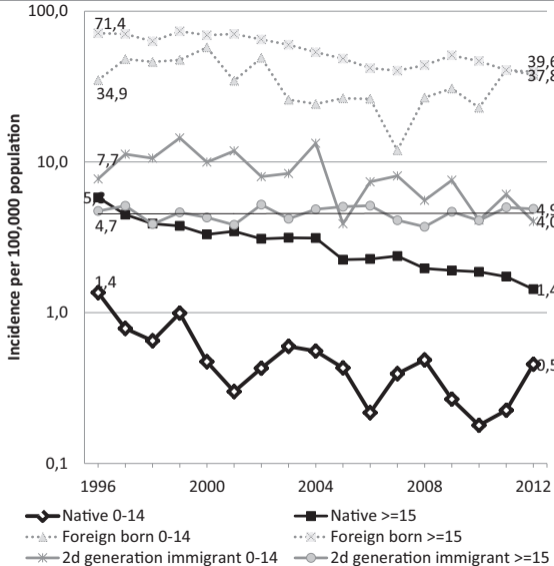

Supplement: MOESM2 [file 9446256]
